# Supplementary material
Source: Royal Society of Chemistry journal article supplement (doi:10.1039/d6lp00058d)
Supplement: d6lp00058d1.pdf [file d6lp00058d1.pdf]

**Redox-Responsive Photo-polymerizable PEG-based Hydrogels:  
Diverse Functionalization, 3D-Printing, and  
On-Demand Degradation for Protein Release**

*Meltem Alkis,<sup>1,‡</sup> Altan Gumuskaya,<sup>1,‡</sup> Salli Kocak,<sup>1</sup> Ismail Altinbasak,<sup>1</sup> Rana Sanyal,<sup>1,2</sup> Amitav Sanyal<sup>1,2\*</sup>*

*<sup>1</sup>Department of Chemistry, Bogazici University, Bebek 34342, Istanbul, Türkiye*

*<sup>2</sup>Bogazici University Center for Targeted Therapy Technologies, Bogazici University, 34684, Istanbul, Türkiye*

*<sup>‡</sup> Equal contribution by these co-authors*

*\*Author to whom correspondence should be addressed; E-Mail: amitav.sanyal@bogazici.edu.tr*

## LIST of FIGURES

**Figure S1.** FTIR spectra of PEG and PEGDMASS polymers.

**Figure S2.** SEC chromatograms of PEG and PEGDMASS polymers using PMMA calibrants with dimethylacetamide as eluent.

**Figure S3.**  $^{13}\text{C}$  NMR spectrum of PEGDMASS polymer.

**Figure S4.** Ellman's assay for free thiol content measurement of hydrogel samples.

**Figure S5.** Amplitude sweep test of hydrogels.

**Figure S6.** Frequency sweep ( $\omega$ ) comparison of HG-3<sub>25</sub> hydrogels.

**Figure S7.** Schematic illustration and fluorescence microscopy images of HG-4<sub>0</sub> modified with thiol-reactive SAMSA fluorescent dye.

**Figure S8.** Schematic illustration and fluorescence microscopy images of HG-4<sub>0</sub> modified with thiol-reactive maleimide-containing TAMRA molecule.

**Figure S9.** The amplitude sweep tests of hydrogels a) without (data already presented as Figure S5) and b) with GG.

**Figure S10.** Degradation profiles of 3D-printed hydrogel in 100 mM DTT in PBS at room temperature.

**Figure S11.** The gravimetric mass change of 3D-printed hydrogels over 7 days period.

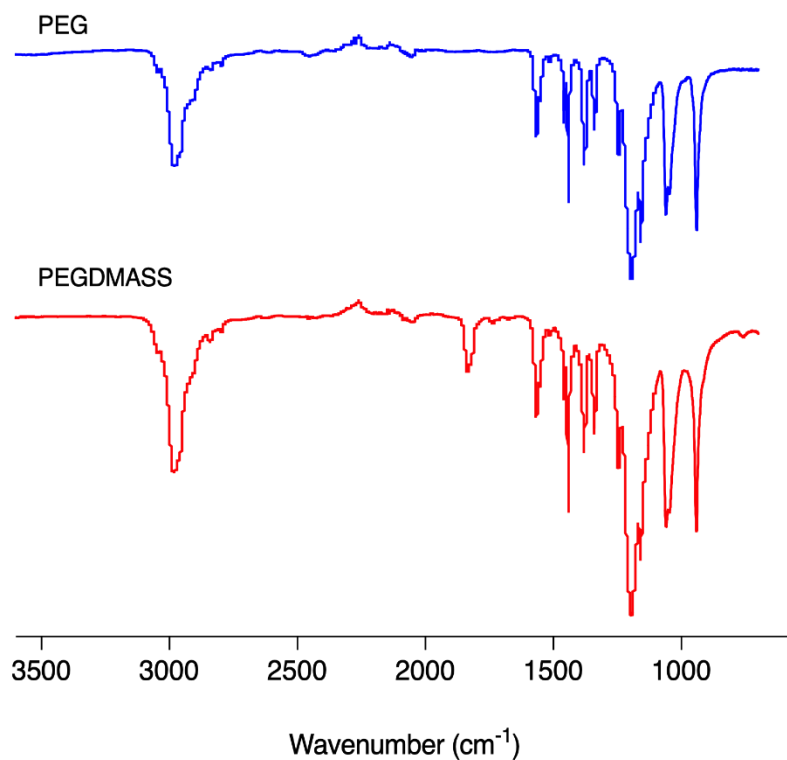

**Figure S1.** FTIR spectra of PEG and PEGDMASS polymers.

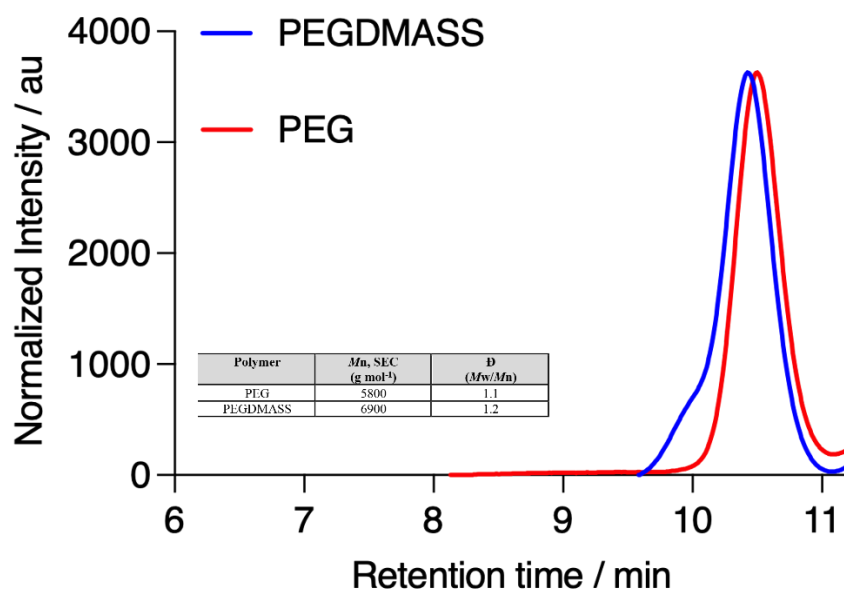

**Figure S2.** SEC chromatograms of PEG and PEGDMASS polymers using PMMA calibrants with dimethylacetamide as eluent.

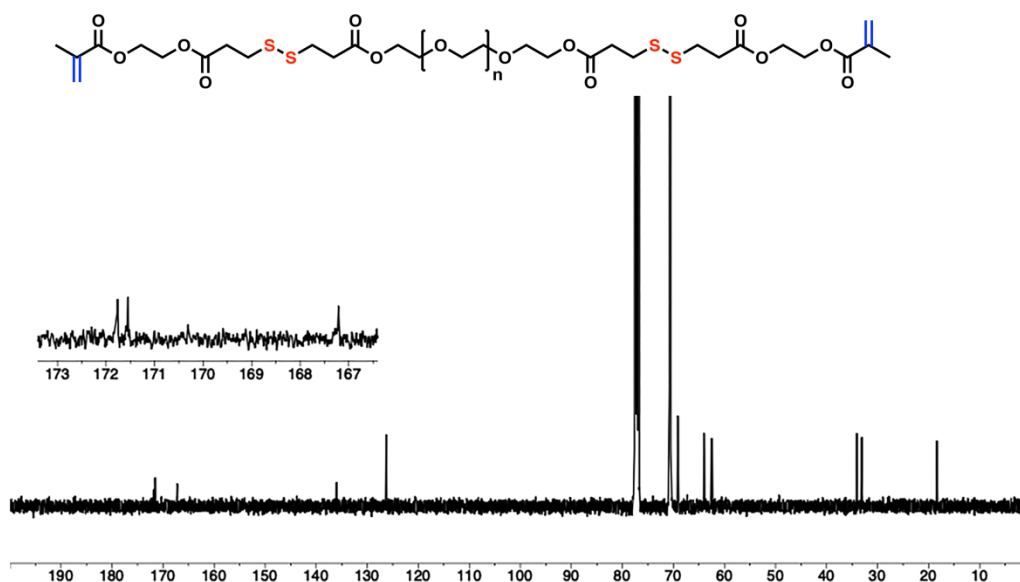

**Figure S3.**  $^{13}\text{C}$  NMR spectrum of PEGDMASS Polymer.

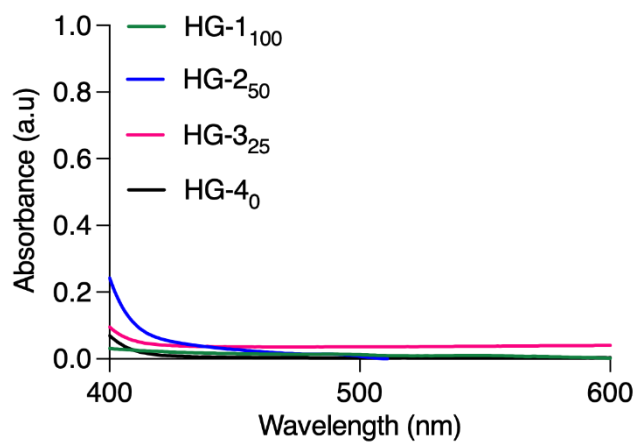

**Figure S4.** Ellman's assay for free thiol content measurement of hydrogel samples.

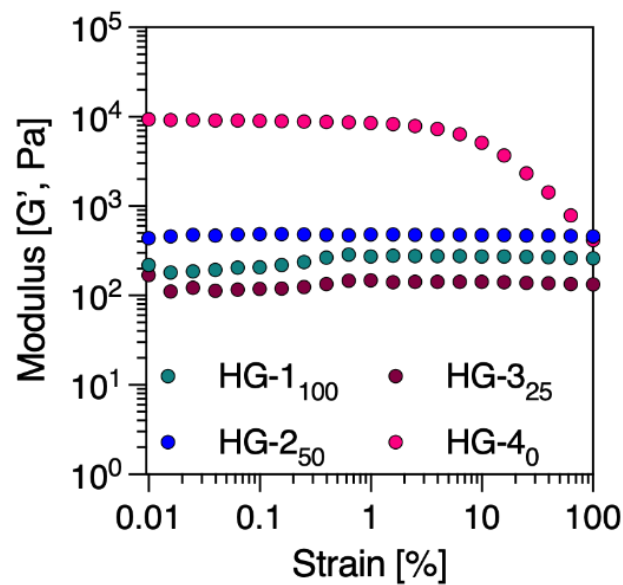

**Figure S5.** Amplitude sweep test of hydrogels.

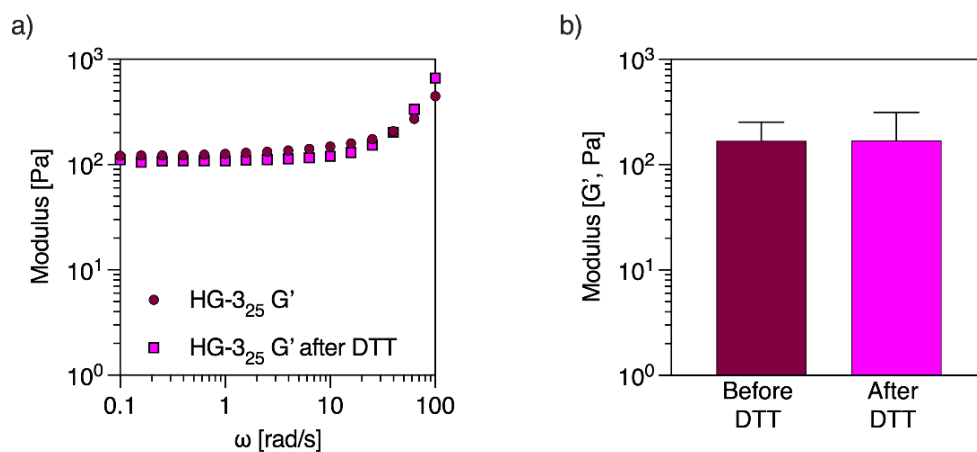

**Figure S6.** Frequency sweep ( $\omega$ ) comparison of HG-3<sub>25</sub> hydrogels. a) Storage modulus ( $G'$ ) of HG3<sub>25</sub> in its initial state and b) storage modulus ( $G'$ ) after dye functionalization of HG-3<sub>25</sub> and subsequent DTT treatment.

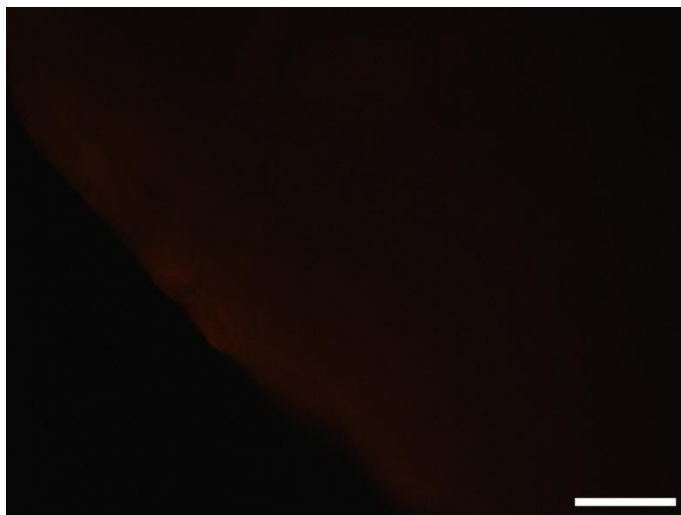

**Figure S7.** Schematic illustration and fluorescence microscopy images of HG-4<sub>0</sub> modified with thiol-reactive maleimide-containing TAMRA molecule. Scale bar represents 100  $\mu\text{m}$ .

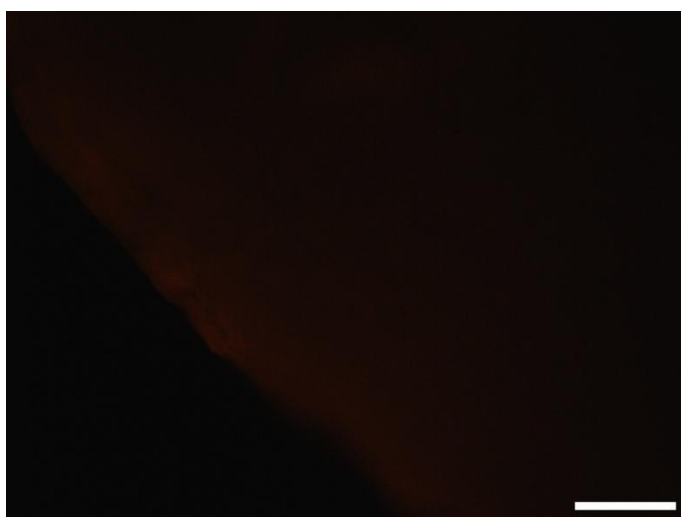

**Figure S8.** Schematic illustration and fluorescence microscopy images of HG-4<sub>0</sub> modified with thiol-reactive SAMSA fluorescent dye. Scale bar represents 100  $\mu\text{m}$ .

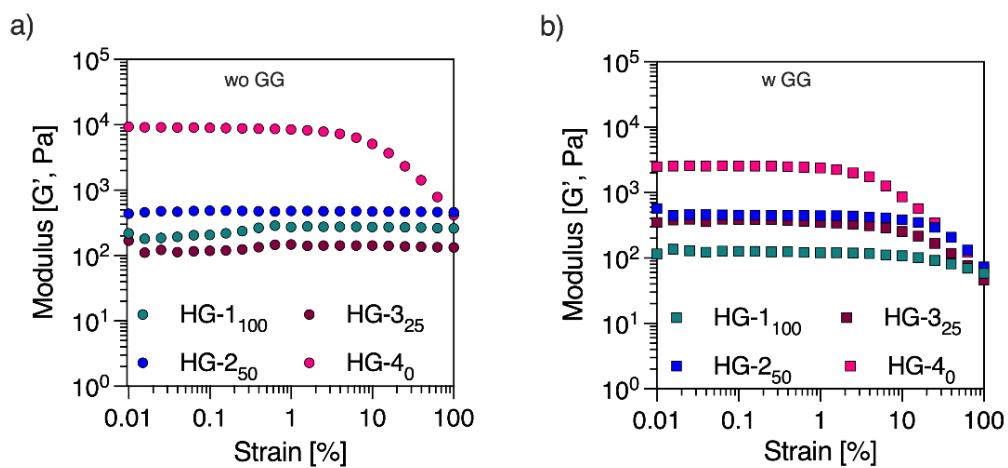

**Figure S9.** The amplitude sweep tests of hydrogels, a) without (data already presented as Figure S5) and b) with GG.

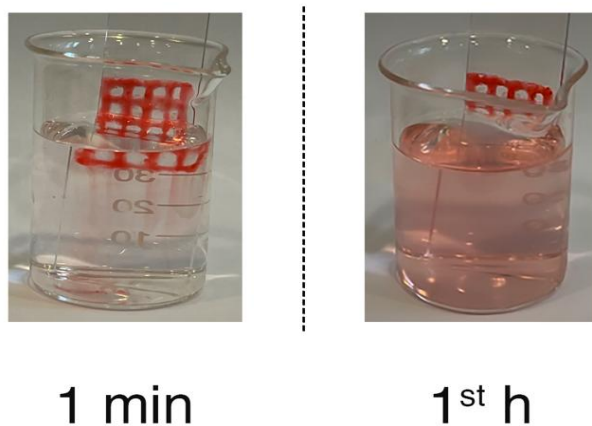

**Figure S10.** Degradation profiles of 3D-printed hydrogel in 100 mM DTT in PBS at room temperature.

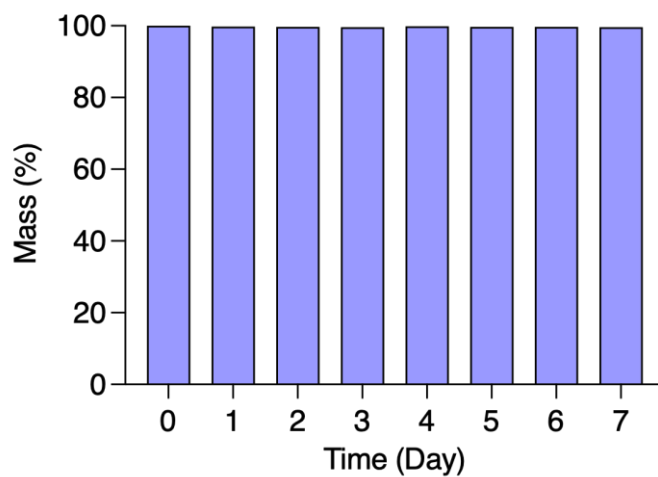

**Figure S11.** The gravimetric mass change of 3D-printed hydrogels over 7 days period.
